# Supplementary material for: Detecting past and ongoing natural selection among ethnically Tibetan women at high altitude in Nepal
Source: PubMed Central journal article supplement (PMC6143271; doi:10.1371/journal.pgen.1007650), 2018-09-06
Supplement: pgen.1007650.s013.pdf [file pgen.1007650.s013.pdf]

**S1 Table.** Indigenous high-altitude individuals for whole genome sequencing and Illumina array genotyping

| A. Whole genome sequencing   |                |                                         |    |            |          |            |
|------------------------------|----------------|-----------------------------------------|----|------------|----------|------------|
| Population                   | Coverage group | Sampling scheme                         | N  | Platform   | Coverage | Source     |
| Tibetan                      | High           | Unrelated                               | 2  | HiSeq 2000 | ~30x     | [1]        |
|                              | High           | Duo                                     | 8  | HiSeq 2500 | ~20x     | This study |
|                              | Low            | Unrelated                               | 27 | HiSeq 2500 | ~5x      | This study |
| Sherpa                       | High           | Unrelated                               | 4  | HiSeq 2500 | ~30x     | [1, 2]     |
|                              | High           | Trio                                    | 9  | HiSeq 2500 | ~20x     | This study |
|                              | Low            | Unrelated                               | 9  | HiSeq 2500 | ~5x      | This study |
| B. Illumina array genotyping |                |                                         |    |            |          |            |
| Population                   | N              | Genotyping Platform                     |    | Source     |          |            |
| Tibetan                      | 657            | HumanCore-12 v1.0A                      |    | This study |          |            |
|                              | 344            | HumanCore-12 v1.0A, OmniExpress-24 v1.0 |    | This study |          |            |
| Sherpa                       | 103            | OmniExpress-24 v1.0                     |    | This study |          |            |
|                              | 69             | Omni1-Quad                              |    | [1]        |          |            |

## References

1. Mallick S, Li H, Lipson M, Mathieson I, Gymrek M, Racimo F et al. (2016) The Simons Genome Diversity Project: 300 genomes from 142 diverse populations. *Nature* 538: 201-206.
2. Jeong C, Alkorta-Aranburu G, Basnyat B, Neupane M, Witonsky DB, Pritchard JK et al. (2014) Admixture facilitates genetic adaptations to high altitude in Tibet. *Nat Commun* 5: 3281.
