# Supplementary material for: Detecting past and ongoing natural selection among ethnically Tibetan women at high altitude in Nepal
Source: PubMed Central journal article supplement (PMC6143271; doi:10.1371/journal.pgen.1007650), 2018-09-06
Supplement: pgen.1007650.s014.pdf [file pgen.1007650.s014.pdf]

**S2 Table.** A summary of multi-sample variant calling of 59 high-altitude genomes.

**A. Types of variants**

| Type                        | Subtype           | # of SNPs |
|-----------------------------|-------------------|-----------|
| All                         |                   | 9,742,498 |
| Not present in 1KGP phase 3 | All               | 1,364,150 |
|                             | Intergenic        | 746,786   |
|                             | Intronic          | 475,302   |
|                             | UTR               | 14,719    |
|                             | Splicing          | 126       |
|                             | ncRNA             | 93,631    |
|                             | Exonic            | 13,974    |
|                             | Exonic - silent   | 4,784     |
|                             | Exonic - missense | 8,679     |
| Exonic - nonsense           | 235               |           |

**B. Site Frequency Spectrum**

| # ALT | Proportion (%) |
|-------|----------------|
| 1     | 29.46          |
| 2     | 24.14          |
| 3     | 11.51          |
| 4     | 7.05           |
| 5     | 4.40           |
| > 5   | 23.43          |
