# Supplementary material for: Detecting past and ongoing natural selection among ethnically Tibetan women at high altitude in Nepal
Source: PubMed Central journal article supplement (PMC6143271; doi:10.1371/journal.pgen.1007650), 2018-09-06
Supplement: pgen.1007650.s015.pdf [file pgen.1007650.s015.pdf]

**S3 Table.** Phenotypes for genome-wide association analysis

| Phenotype                                                 | N                                                              | nSNPs                          |           |
|-----------------------------------------------------------|----------------------------------------------------------------|--------------------------------|-----------|
| <b>1. Physiological phenotypes</b>                        |                                                                |                                |           |
| Hb                                                        | Blood hemoglobin concentration (g/dL)                          | 921                            | 3,507,568 |
| SaO <sub>2</sub>                                          | Arterial blood oxygen saturation (%)                           | 921                            | 3,507,568 |
| Pulse                                                     | The number of pulses per minute                                | 920                            | 3,508,046 |
| oxyHb                                                     | Oxygenated Hb (= Hb × SaO <sub>2</sub> / 100)                  | 921                            | 3,507,568 |
| deoxyHb                                                   | Deoxygenated Hb (= Hb - oxyHb)                                 | 921                            | 3,507,568 |
| <b>2. Fertility count phenotypes</b>                      |                                                                |                                |           |
| # of pregnancies                                          |                                                                | 981                            | 3,507,697 |
| # of live births                                          |                                                                | 981                            | 3,507,697 |
| # of children born alive but died < 1 yr                  |                                                                | 923                            | 3,507,108 |
| # of children surviving at 1 yr but died < 5 yr           |                                                                | 849                            | 3,507,585 |
| # of children surviving at 5 yr but died < 15 yr          |                                                                | 531                            | 3,506,695 |
| # of children born alive but died < 5 yr                  |                                                                | 849                            | 3,507,585 |
| # of children born alive but died < 15 yr                 |                                                                | 532                            | 3,506,123 |
| # of children surviving at 1 yr                           |                                                                | 923                            | 3,507,108 |
| # of children surviving at 5 yr                           |                                                                | 849                            | 3,507,585 |
| # of children surviving at 15 yr                          |                                                                | 531                            | 3,506,695 |
| # of stillbirths                                          |                                                                | 981                            | 3,507,697 |
| # of miscarriages                                         |                                                                | 981                            | 3,507,697 |
| # of twin births                                          |                                                                | 981                            | 3,507,697 |
| A woman's age at her first childbirth                     |                                                                | 972                            | 3,507,330 |
| A woman's age at her last pregnancy                       |                                                                | 958                            | 3,507,463 |
| <b>3. Fertility proportion phenotypes</b>                 |                                                                |                                |           |
| Proportion of live births among pregnancies               |                                                                | 981                            | 3,507,697 |
| Proportion of stillbirths among pregnancies               |                                                                | 981                            | 3,507,697 |
| Proportion of miscarriages among pregnancies              |                                                                | 981                            | 3,507,697 |
| Proportion of children born alive but died < 1 yr         |                                                                | 923                            | 3,507,108 |
| Proportion of children born alive but died < 5 yr         |                                                                | 849                            | 3,507,585 |
| Proportion of children born alive but died < 15 yr        |                                                                | 532                            | 3,506,123 |
| Proportion of children surviving at 1 yr but died < 5 yr  |                                                                | 849                            | 3,507,585 |
| Proportion of children surviving at 5 yr but died < 15 yr |                                                                | 531                            | 3,507,249 |
| <b>4. Covariates</b>                                      |                                                                |                                |           |
| Hb ~ sub + age + SaO <sub>2</sub> + ft                    | SaO <sub>2</sub> ~ sub + age + alt + Hb + Hb <sup>2</sup> + ft |                                |           |
| Pulse ~ sub + Hb + SaO <sub>2</sub> + ft                  | oxyHb ~ sub + age + age <sup>2</sup> + ft                      | deoxyHb ~ sub + age + alt + ft |           |
| Fertility counts and proportions ~ sub + age + ct + CM    |                                                                |                                |           |

Sub = subdistrict label (4 groups); alt = altitude of residence

ft = fingertip temperature; ct = use of contraception; CM = continuously married
