# Supplementary material for: Detecting past and ongoing natural selection among ethnically Tibetan women at high altitude in Nepal
Source: PubMed Central journal article supplement (PMC6143271; doi:10.1371/journal.pgen.1007650), 2018-09-06
Supplement: pgen.1007650.s018.pdf [file pgen.1007650.s018.pdf]

**S6 Table.** *P*-values for the correlation between fertility and physiological phenotypes. Tests with  $p \leq 0.01$  were marked with grey shades. Positive regression coefficients are marked in red color.

| Phenotype                                                 | Hb                    | Sat          | Pulse                 | oxyHb                 | deoxyHb      |
|-----------------------------------------------------------|-----------------------|--------------|-----------------------|-----------------------|--------------|
| # of pregnancies                                          | 0.398                 | 0.949        | $2.02 \times 10^{-5}$ | 0.395                 | 0.832        |
| # of live births                                          | 0.135                 | 0.996        | $2.76 \times 10^{-5}$ | 0.142                 | 0.652        |
| # of children born alive but died < 1 yr                  | 0.052                 | <b>0.639</b> | $4.84 \times 10^{-3}$ | 0.114                 | 0.219        |
| # of children surviving at 1 yr but died < 5 yr           | 0.429                 | <b>0.598</b> | 0.393                 | 0.561                 | 0.538        |
| # of children surviving at 5 yr but died < 15 yr          | 0.768                 | 0.891        | $1.38 \times 10^{-3}$ | 0.707                 | <b>0.947</b> |
| # of children born alive but died < 5 yr                  | 0.040                 | <b>0.454</b> | 0.012                 | 0.109                 | 0.156        |
| # of children born alive but died < 15 yr                 | 0.015                 | 0.663        | 0.029                 | 0.012                 | 0.597        |
| # of children surviving at 1 yr                           | 0.246                 | 0.524        | $6.89 \times 10^{-3}$ | 0.138                 | <b>0.751</b> |
| # of children surviving at 5 yr                           | 0.484                 | 0.384        | 0.030                 | 0.264                 | <b>0.541</b> |
| # of children surviving at 15 yr                          | 0.685                 | <b>0.564</b> | 0.421                 | 0.836                 | 0.635        |
| # of stillbirths                                          | <b>0.040</b>          | <b>0.795</b> | 0.043                 | <b>0.034</b>          | <b>0.686</b> |
| # of miscarriages                                         | <b>0.057</b>          | 0.784        | <b>0.769</b>          | <b>0.074</b>          | <b>0.458</b> |
| # of twin births                                          | <b>0.747</b>          | <b>0.587</b> | 0.289                 | <b>0.596</b>          | 0.744        |
| A woman's age at her first childbirth                     | <b>0.255</b>          | 0.885        | <b>0.707</b>          | <b>0.295</b>          | <b>0.639</b> |
| A woman's age at her last pregnancy                       | 0.404                 | 0.737        | 0.035                 | 0.297                 | <b>0.846</b> |
| Proportion of live births among pregnancies               | $2.20 \times 10^{-3}$ | <b>0.915</b> | <b>0.994</b>          | $3.08 \times 10^{-3}$ | 0.335        |
| Proportion of stillbirths among pregnancies               | <b>0.023</b>          | <b>0.856</b> | 0.203                 | <b>0.022</b>          | <b>0.603</b> |
| Proportion of miscarriages among pregnancies              | <b>0.033</b>          | 0.774        | <b>0.273</b>          | <b>0.048</b>          | <b>0.419</b> |
| Proportion of children born alive but died < 1 yr         | 0.194                 | <b>0.446</b> | 0.101                 | 0.430                 | 0.194        |
| Proportion of children born alive but died < 5 yr         | 0.159                 | <b>0.250</b> | 0.217                 | 0.452                 | 0.115        |
| Proportion of children born alive but died < 15 yr        | 0.075                 | 0.555        | 0.150                 | 0.056                 | 0.825        |
| Proportion of children surviving at 1 yr but died < 5 yr  | 0.557                 | <b>0.458</b> | 0.832                 | 0.793                 | 0.442        |
| Proportion of children surviving at 5 yr but died < 15 yr | 0.761                 | 0.943        | $2.21 \times 10^{-3}$ | 0.740                 | 0.971        |
