# Supplementary material for: Detecting past and ongoing natural selection among ethnically Tibetan women at high altitude in Nepal
Source: PubMed Central journal article supplement (PMC6143271; doi:10.1371/journal.pgen.1007650), 2018-09-06
Supplement: pgen.1007650.s019.pdf [file pgen.1007650.s019.pdf]

**S7 Table.** *P* values for the correlation between fertility or fertility proportion phenotypes controlling for covariates and the *EGLNI* and *EPASI* SNP genotypes. Per-allele selection coefficient for 80% power to detect association in a single SNP test ( $\alpha = 0.05$ ) was estimated for fertility count phenotypes. No test showed  $p \leq 0.01$ .

| Phenotype                                                 | <i>EGLNI</i> <sup>a</sup> |                                     | <i>EPASI</i> <sup>b</sup> |                        |
|-----------------------------------------------------------|---------------------------|-------------------------------------|---------------------------|------------------------|
|                                                           | <i>P</i> -value           | S <sub>80%</sub> power <sup>c</sup> | <i>P</i> -value           | S <sub>80%</sub> power |
| # of pregnancies                                          | 0.564                     | 0.066                               | 0.621                     | 0.074                  |
| # of live births                                          | 0.925                     | 0.068                               | 0.951                     | 0.076                  |
| # of children born alive and died < 1 yr                  | 0.119                     | 0.146                               | 0.046                     | 0.152                  |
| # of children died ≥ 1 yr and < 5 yrs                     | 0.888                     | 0.197                               | 0.813                     | 0.203                  |
| # of children died ≥ 5 yr and < 15 yrs                    | 0.095                     | 0.256                               | 0.083                     | 0.259                  |
| # of children died < 5 yrs                                | 0.505                     | 0.126                               | 0.064                     | 0.132                  |
| # of children died < 15 yrs                               | 0.045                     | 0.140                               | 0.194                     | 0.147                  |
| # of children surviving at 1 yr                           | 0.970                     | 0.068                               | 0.395                     | 0.076                  |
| # of children surviving at 5 yr                           | 0.965                     | 0.073                               | 0.307                     | 0.082                  |
| # of children surviving at 15 yr                          | 0.599                     | 0.103                               | 0.670                     | 0.117                  |
| # of stillbirths                                          | 0.053                     | 0.273                               | 0.400                     | 0.274                  |
| # of miscarriages                                         | 0.111                     | 0.251                               | 0.117                     | 0.254                  |
| # of twin births                                          | 0.338                     |                                     | 0.683                     |                        |
| A woman's age at her first childbirth                     | 0.090                     |                                     | 0.346                     |                        |
| A woman's age at her last pregnancy                       | 0.187                     |                                     | 0.151                     |                        |
| Proportion of live births among pregnancies               | 0.020                     |                                     | 0.126                     |                        |
| Proportion of stillbirths among pregnancies               | 0.074                     |                                     | 0.451                     |                        |
| Proportion of miscarriages among pregnancies              | 0.139                     |                                     | 0.142                     |                        |
| Proportion of children born alive but died < 1 yr         | 0.159                     |                                     | 0.025                     |                        |
| Proportion of children born alive but died < 5 yr         | 0.605                     |                                     | 0.028                     |                        |
| Proportion of children born alive but died < 15 yr        | 0.147                     |                                     | 0.177                     |                        |
| Proportion of children surviving at 1 yr but died < 5 yr  | 0.893                     |                                     | 0.556                     |                        |
| Proportion of children surviving at 5 yr but died < 15 yr | 0.167                     |                                     | 0.086                     |                        |

<sup>a</sup> The number of derived (Tibetan) allele in the *EGLNI* SNP rs186996510

<sup>b</sup> The number of derived (Tibetan) allele in the *EPASI* SNP rs372272284

<sup>c</sup> Estimated per allele selection coefficient for 80% power with a single test ( $\alpha = 0.05$ )
