# Supplementary material for: Detecting past and ongoing natural selection among ethnically Tibetan women at high altitude in Nepal
Source: PubMed Central journal article supplement (PMC6143271; doi:10.1371/journal.pgen.1007650), 2018-09-06
Supplement: pgen.1007650.s020.pdf [file pgen.1007650.s020.pdf]

**S8 Table.** Results of polygenic adaptation tests for the GWAS phenotypes

| Phenotype                                                 | # SNPs | Direction <sup>a</sup> | $P_{\text{freq.diff}}$ <sup>b</sup> | $P_{\text{overdispersion}}$ <sup>c</sup> | $P_{\text{outlier}}$ <sup>d</sup> |
|-----------------------------------------------------------|--------|------------------------|-------------------------------------|------------------------------------------|-----------------------------------|
| <b>1. Physiological phenotypes</b>                        |        |                        |                                     |                                          |                                   |
| Hb                                                        | 36     | -                      | 0.0470                              | 0.0654                                   | 0.0000                            |
| Hb (no EPAS1)                                             | 35     | -                      | 0.4666                              | 0.2006                                   | 0.8460                            |
| Hb (European)                                             | 91     | -                      | 0.2488                              | 0.4334                                   | 0.1100                            |
| SaO <sub>2</sub>                                          | 48     | +                      | 0.8517                              | 0.5804                                   | 0.6464                            |
| oxyHb                                                     | 43     | -                      | 0.1016                              | 0.6828                                   | 0.0008                            |
| oxyHb (no EPAS1)                                          | 42     | -                      | 0.5544                              | 0.6952                                   | 0.0656                            |
| deoxyHb                                                   | 45     | -                      | 0.0232                              | 0.2478                                   | 0.0024                            |
| Pulse                                                     | 52     | -                      | 0.0620                              | 0.1570                                   | 0.4048                            |
| Pulse (European)                                          | 123    | -                      | 0.0001                              | 0.1020                                   | 0.4080                            |
| <b>2. Fertility Counts (all samples)</b>                  |        |                        |                                     |                                          |                                   |
| # of pregnancies                                          | 37     | +                      | 0.4914                              | 0.1598                                   | 0.7732                            |
| # of live births                                          | 40     | +                      | 0.5298                              | 0.0284                                   | 0.8652                            |
| # of children born alive but died < 1 yr                  | 44     | -                      | 0.2638                              | 0.4788                                   | 0.0940                            |
| # of children surviving at 1 yr but died < 5 yr           | 39     | -                      | 0.1344                              | 0.6272                                   | 0.0000                            |
| # of children surviving at 5 yr but died < 15 yr          | 45     | -                      | 0.0702                              | 0.6494                                   | 0.1020                            |
| # of children born alive but died < 5 yr                  | 34     | -                      | 0.3784                              | 0.4580                                   | 0.2060                            |
| # of children born alive but died < 15 yr                 | 46     | -                      | 0.1159                              | 0.2968                                   | 0.0936                            |
| # of children surviving at 1 yr                           | 46     | +                      | 0.0166                              | 0.0402                                   | 0.0100                            |
| # of children surviving at 5 yr                           | 45     | +                      | 0.4383                              | 0.8132                                   | 0.8672                            |
| # of children surviving at 15 yr                          | 45     | +                      | 0.3128                              | 0.2444                                   | 0.4780                            |
| # of stillbirths                                          | 60     | -                      | 0.5398                              | 0.3850                                   | 0.3264                            |
| # of miscarriages                                         | 53     | -                      | 0.8412                              | 0.5244                                   | 0.0840                            |
| # of twin births                                          | 47     | -                      | 0.1389                              | 0.7576                                   | 0.0024                            |
| A woman's age at her first childbirth                     | 35     | -                      | 0.4003                              | 0.8180                                   | 0.3180                            |
| A woman's age at her last pregnancy                       | 35     | +                      | 0.3673                              | 0.4608                                   | 0.9920                            |
| <b>3. Fertility proportions (all samples)</b>             |        |                        |                                     |                                          |                                   |
| Proportion of live births among pregnancies               | 31     | +                      | 0.6096                              | 0.6666                                   | 0.7820                            |
| Proportion of stillbirths among pregnancies               | 39     | -                      | 0.2852                              | 0.6026                                   | 0.0004                            |
| Proportion of miscarriages among pregnancies              | 35     | -                      | 0.7469                              | 0.0534                                   | 0.3604                            |
| Proportion of children born alive but died < 1 yr         | 41     | -                      | 0.7819                              | 0.1354                                   | 0.2956                            |
| Proportion of children born alive but died < 5 yr         | 32     | -                      | 0.9329                              | 0.0848                                   | 0.5504                            |
| Proportion of children born alive but died < 15 yr        | 42     | -                      | 0.5430                              | 0.1498                                   | 0.4452                            |
| Proportion of children surviving at 1 yr but died < 5 yr  | 35     | -                      | 0.4650                              | 0.5392                                   | 0.8728                            |
| Proportion of children surviving at 5 yr but died < 15 yr | 40     | -                      | 0.2881                              | 0.9640                                   | 0.5504                            |

(Continued in the next page)

**S8 Table.** (Continued from the previous page)

| Phenotype                                                 | # SNPs | Direction <sup>a</sup> | $P_{\text{freq.diff}}$ <sup>b</sup> | $P_{\text{overdispersion}}$ <sup>c</sup> | $P_{\text{outlier}}$ <sup>d</sup> |
|-----------------------------------------------------------|--------|------------------------|-------------------------------------|------------------------------------------|-----------------------------------|
| <b>4. Fertility Counts (CM subset)</b>                    |        |                        |                                     |                                          |                                   |
| # of pregnancies                                          | 49     | +                      | 0.0132                              | 0.6232                                   | 0.2892                            |
| # of live births                                          | 43     | +                      | 0.0016                              | 0.0282                                   | 0.0020                            |
| # of children born alive but died < 1 yr                  | 40     | -                      | 0.0121                              | 0.0746                                   | 0.0000                            |
| # of children surviving at 1 yr but died < 5 yr           | 42     | -                      | 0.7543                              | 0.7786                                   | 0.7896                            |
| # of children surviving at 5 yr but died < 15 yr          | 68     | -                      | 0.3043                              | 0.5702                                   | 0.0256                            |
| # of children born alive but died < 5 yr                  | 32     | -                      | 0.4068                              | 0.6558                                   | 0.1668                            |
| # of children born alive but died < 15 yr                 | 50     | -                      | 0.0236                              | 0.2432                                   | 0.0000                            |
| # of children surviving at 1 yr                           | 44     | +                      | 0.6344                              | 0.2674                                   | 0.1028                            |
| # of children surviving at 5 yr                           | 50     | +                      | 0.4294                              | 0.3374                                   | 0.4912                            |
| # of children surviving at 15 yr                          | 72     | +                      | 0.2506                              | 0.5352                                   | 0.6644                            |
| # of stillbirths                                          | 85     | -                      | 0.8547                              | 0.3146                                   | 0.6988                            |
| # of miscarriages                                         | 91     | -                      | 0.0243                              | 0.3632                                   | 0.0000                            |
| # of twin births                                          | 59     | -                      | 0.0210                              | 0.6340                                   | 0.0000                            |
| A woman's age at her first childbirth                     | 60     | -                      | 0.5764                              | 0.0714                                   | 0.0000                            |
| A woman's age at her last pregnancy                       | 48     | +                      | 0.7874                              | 0.2622                                   | 0.6476                            |
| <b>5. Fertility proportions (CM subset)</b>               |        |                        |                                     |                                          |                                   |
| Proportion of live births among pregnancies               | 38     | +                      | 0.4013                              | 0.1380                                   | 0.1624                            |
| Proportion of stillbirths among pregnancies               | 44     | -                      | 0.2299                              | 0.3822                                   | 0.0008                            |
| Proportion of miscarriages among pregnancies              | 35     | -                      | 0.3929                              | 0.1486                                   | 0.3480                            |
| Proportion of children born alive but died < 1 yr         | 44     | -                      | 0.2765                              | 0.6604                                   | 0.2812                            |
| Proportion of children born alive but died < 5 yr         | 38     | -                      | 0.5171                              | 0.9830                                   | 0.0740                            |
| Proportion of children born alive but died < 15 yr        | 39     | -                      | 0.1015                              | 0.3980                                   | 0.0224                            |
| Proportion of children surviving at 1 yr but died < 5 yr  | 52     | -                      | 0.8736                              | 0.4502                                   | 0.2332                            |
| Proportion of children surviving at 5 yr but died < 15 yr | 44     | -                      | 0.6447                              | 0.5886                                   | 0.0548                            |

<sup>a</sup> Assumed direction of positive selection for each phenotype

<sup>b</sup> One-sided empirical  $p$ -value for the mean frequency difference test

<sup>c</sup>  $P$ -value for the overdispersion test

<sup>d</sup>  $P$ -value for the outlier test of Tibetans and the Sherpa

<sup>e</sup> Results with the continuously married subset of individuals
