# Supplementary material for: Detecting past and ongoing natural selection among ethnically Tibetan women at high altitude in Nepal
Source: PubMed Central journal article supplement (PMC6143271; doi:10.1371/journal.pgen.1007650), 2018-09-06
Supplement: pgen.1007650.s022.pdf [file pgen.1007650.s022.pdf]

**S10 Table.** Two-way admixture modeling of the Himalayan Tibetans using the qpAdm program. Sherpas from the Khumbu region and a South Asian population are used as sources. All four sub-district groups are adequately approximated by the two-way model ( $P_{2way} \geq 0.05$ ). Coef<sub>1</sub>, Coef<sub>2</sub> and SE columns represent estimated ancestry proportions from Ref<sub>1</sub> (Sherpa) and Ref<sub>2</sub> (South Asian), as well as their associated standard errors. Although the South Asian ancestry proportion is small (2.5-6.2%), it is necessary to explain the Himalayan Tibetans, as shown by the insufficiency of the Sherpa-only model ( $P_{1way} \ll 0.05$ ).

| Target        | Ref <sub>1</sub> | Ref <sub>2</sub> | $P_{2way}$ | $P_{1way}$             | Coef <sub>1</sub> | Coef <sub>2</sub> | SE    |
|---------------|------------------|------------------|------------|------------------------|-------------------|-------------------|-------|
| Nubri         | Sherpa           | Brahui           | 0.853      | $4.92 \times 10^{-27}$ | 0.961             | 0.039             | 0.003 |
|               |                  | Kalash           | 0.826      | $5.94 \times 10^{-27}$ | 0.959             | 0.041             | 0.004 |
|               |                  | Pathan           | 0.888      | $3.57 \times 10^{-27}$ | 0.958             | 0.042             | 0.004 |
| Tsum          | Sherpa           | Brahui           | 0.385      | $3.02 \times 10^{-12}$ | 0.974             | 0.026             | 0.004 |
|               |                  | Kalash           | 0.263      | $6.14 \times 10^{-12}$ | 0.973             | 0.027             | 0.004 |
|               |                  | Pathan           | 0.310      | $4.22 \times 10^{-12}$ | 0.972             | 0.028             | 0.004 |
| Lower Mustang | Sherpa           | Brahui           | 0.618      | $2.82 \times 10^{-59}$ | 0.943             | 0.057             | 0.003 |
|               |                  | Kalash           | 0.280      | $1.54 \times 10^{-58}$ | 0.940             | 0.060             | 0.004 |
|               |                  | Pathan           | 0.505      | $2.87 \times 10^{-59}$ | 0.938             | 0.062             | 0.004 |
| Upper Mustang | Sherpa           | Brahui           | 0.487      | $3.31 \times 10^{-16}$ | 0.975             | 0.025             | 0.003 |
|               |                  | Kalash           | 0.380      | $5.81 \times 10^{-16}$ | 0.974             | 0.026             | 0.003 |
|               |                  | Pathan           | 0.410      | $3.93 \times 10^{-16}$ | 0.973             | 0.027             | 0.003 |
