# Supplementary material for: Detecting past and ongoing natural selection among ethnically Tibetan women at high altitude in Nepal
Source: PubMed Central journal article supplement (PMC6143271; doi:10.1371/journal.pgen.1007650), 2018-09-06
Supplement: pgen.1007650.s023.pdf [file pgen.1007650.s023.pdf]

**S11 Table.** Estimates of power to detect an association between the *EGLN1* SNP rs186996510 and Hb in our data set. We used effect size estimates from multiple studies, ranging from 0.386 to 1.676 g/dL per allele. Power was calculated using the observed allele frequency (maf = 0.336), sample size (n=649) and standard deviation of Hb residuals after regressing out covariates (1.330 g/dL), assuming a single test ( $\alpha = 0.05$ ).

| Source                                        | Effect size (g/dL/allele) | Power |
|-----------------------------------------------|---------------------------|-------|
| Simonson et al. (mixed gender) [1]            | 1.676                     | 1.000 |
| Xiang et al. (male only) [2]                  | 0.620                     | 1.000 |
| This study (top <i>EPASI</i> SNP rs372272284) | 0.386                     | 0.999 |
| An estimate for 99% power                     | 0.332                     | 0.990 |
| An estimate for 95% power                     | 0.280                     | 0.950 |
| An estimate for 90% power                     | 0.252                     | 0.900 |
| An estimate for 80% power                     | 0.218                     | 0.800 |

## References

1. Simonson TS, Yang Y, Huff CD, Yun H, Qin G, Witherspoon DJ et al. (2010) Genetic evidence for high-altitude adaptation in Tibet. *Science* 329: 72-75.
2. Xiang K, Peng Y, Yang Z, Zhang X, Cui C, Zhang H et al. (2013) Identification of a Tibetan-specific mutation in the hypoxic gene *EGLN1* and its contribution to high-altitude adaptation. *Mol Biol Evol* 30: 1889-1898.
