# Supplementary material for: Detecting past and ongoing natural selection among ethnically Tibetan women at high altitude in Nepal
Source: PubMed Central journal article supplement (PMC6143271; doi:10.1371/journal.pgen.1007650), 2018-09-06
Supplement: pgen.1007650.s024.pdf [file pgen.1007650.s024.pdf]

**S12 Table.** Correlation of GWAS  $-\log_{10}(p)$  between the main GWAS run including relatives and the one including unrelated individuals only. For each phenotype, we present the number of individuals included in the main GWAS ( $n_{\text{ind}}$ ), the number of unrelated individuals ( $n_{\text{unrelated}}$ ), and Pearson’s correlation coefficient across overlapping SNPs ( $r$ ). For fertility phenotypes, we present results both for all-sample set and for the continuously married subset.

| Phenotype                                                 | All-sample set   |                        |       | Continuously married |                        |       |
|-----------------------------------------------------------|------------------|------------------------|-------|----------------------|------------------------|-------|
|                                                           | $n_{\text{ind}}$ | $n_{\text{unrelated}}$ | $r$   | $n_{\text{ind}}$     | $n_{\text{unrelated}}$ | $r$   |
| <b>1. Physiological phenotypes</b>                        |                  |                        |       |                      |                        |       |
| Hb                                                        | 921              | 339                    | 0.210 |                      |                        |       |
| SaO <sub>2</sub>                                          | 921              | 339                    | 0.343 |                      |                        |       |
| Pulse                                                     | 920              | 339                    | 0.328 |                      |                        |       |
| oxyHb                                                     | 921              | 339                    | 0.213 |                      |                        |       |
| deoxyHb                                                   | 921              | 339                    | 0.367 |                      |                        |       |
| <b>2. Fertility count phenotypes</b>                      |                  |                        |       |                      |                        |       |
| # of pregnancies                                          | 981              | 344                    | 0.345 | 585                  | 272                    | 0.425 |
| # of live births                                          | 981              | 344                    | 0.345 | 585                  | 272                    | 0.429 |
| # of children born alive but died < 1 yr                  | 923              | 331                    | 0.363 | 555                  | 262                    | 0.409 |
| # of children surviving at 1 yr but died < 5 yr           | 849              | 306                    | 0.293 | 513                  | 241                    | 0.342 |
| # of children surviving at 5 yr but died < 15 yr          | 531              | 190                    | 0.349 | 319                  | 150                    | 0.434 |
| # of children born alive but died < 5 yr                  | 849              | 306                    | 0.358 | 513                  | 241                    | 0.407 |
| # of children born alive but died < 15 yr                 | 532              | 190                    | 0.312 | 320                  | 150                    | 0.378 |
| # of children surviving at 1 yr                           | 923              | 331                    | 0.368 | 555                  | 262                    | 0.472 |
| # of children surviving at 5 yr                           | 849              | 306                    | 0.363 | 513                  | 241                    | 0.459 |
| # of children surviving at 15 yr                          | 531              | 190                    | 0.377 | 319                  | 150                    | 0.459 |
| # of stillbirths                                          | 981              | 344                    | 0.336 | 585                  | 272                    | 0.439 |
| # of miscarriages                                         | 981              | 344                    | 0.355 | 585                  | 272                    | 0.441 |
| # of twin births                                          | 981              | 344                    | 0.301 | 585                  | 272                    | 0.431 |
| A woman’s age at her first childbirth                     | 972              | 344                    | 0.260 | 581                  | 272                    | 0.445 |
| A woman’s age at her last pregnancy                       | 958              | 344                    | 0.330 | 575                  | 272                    | 0.445 |
| <b>3. Fertility proportion phenotypes</b>                 |                  |                        |       |                      |                        |       |
| Proportion of live births among pregnancies               | 981              | 344                    | 0.348 | 585                  | 272                    | 0.440 |
| Proportion of stillbirths among pregnancies               | 981              | 344                    | 0.318 | 585                  | 272                    | 0.415 |
| Proportion of miscarriages among pregnancies              | 981              | 344                    | 0.300 | 585                  | 272                    | 0.409 |
| Proportion of children born alive but died < 1 yr         | 923              | 331                    | 0.352 | 555                  | 262                    | 0.454 |
| Proportion of children born alive but died < 5 yr         | 849              | 306                    | 0.346 | 513                  | 241                    | 0.451 |
| Proportion of children born alive but died < 15 yr        | 532              | 190                    | 0.387 | 320                  | 150                    | 0.464 |
| Proportion of children surviving at 1 yr but died < 5 yr  | 849              | 306                    | 0.329 | 513                  | 241                    | 0.449 |
| Proportion of children surviving at 5 yr but died < 15 yr | 531              | 190                    | 0.384 | 319                  | 150                    | 0.440 |
